# Supplementary material
Source: MDPI journal article supplement (https://www.mdpi.com/2073-4395/9/2/44)
Supplement: s1 [file s1]

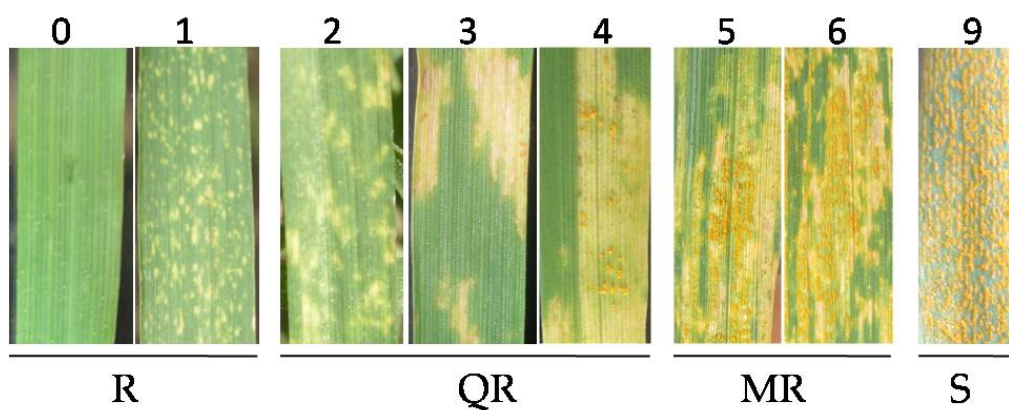

Fig.S1 Stripe rust resistance phenotype in *T. dicoccoides* accessions. Disease severity was characterized using a 0-9 scale of infection type (IT) [37]. R, resistant reactions (ITs 0-1); QR, quantitative resistance (ITs 2-4); MR, intermediate (ITs 5-6); S, susceptible (IT 9).
